# Supplementary material for: Defining a new nomenclature for the structures of active and inactive kinases
Source: PubMed Central journal article supplement — Proc Natl Acad Sci U S A. 2019 Mar 13;116(14):6818–27. doi: 10.1073/pnas.1814279116 (PMC6452665; doi:10.1073/pnas.1814279116), 2019-03-13
Supplement: pnas.1814279116.sapp.pdf [file pnas.1814279116.sapp.pdf]

**Table S1:** List of catalytically primed structures

| Uniprot | PDB  | Chain | Reso | X_Phi  | X_Psi  | Asp_Phi | Asp_Psi | Asp_Chi1 | Asp_Chi2 | Phe_Phi | Phe_Psi | Phe_Chi1 | Ligand |
|---------|------|-------|------|--------|--------|---------|---------|----------|----------|---------|---------|----------|--------|
| AKT2    | 1O6K | A     | 1.7  | -120.8 | -176.0 | 56.8    | 82.9    | 186.7    | 12.6     | -98.9   | 24.5    | 299.4    | ANP    |
| AKT2    | 1O6L | A     | 1.6  | -121.5 | -178.2 | 58.4    | 83.3    | 187.4    | 7.0      | -98.8   | 24.7    | 297.6    | ANP    |
| AURKA   | 5DN3 | A     | 2.0  | -130.9 | -174.4 | 55.3    | 74.8    | 189.2    | 0.9      | -89.0   | 14.2    | 275.5    | ATP    |
| AURKA   | 5DNR | A     | 1.9  | -132.2 | -179.7 | 60.8    | 76.7    | 188.4    | 2.7      | -90.1   | 18.7    | 275.9    | ATP    |
| CDK2    | 1QMZ | A     | 2.2  | -146.3 | -172.6 | 47.5    | 78.4    | 192.7    | -2.0     | -93.9   | 24.3    | 280.2    | ATP    |
| CDK2    | 1QMZ | C     | 2.2  | -147.5 | -169.9 | 41.1    | 80.5    | 192.6    | -4.4     | -95.5   | 25.6    | 283.1    | ATP    |
| CDK2    | 4EOJ | A     | 1.6  | -134.1 | 177.6  | 53.9    | 78.1    | 191.5    | 9.6      | -94.3   | 17.8    | 277.9    | ATP    |
| CDK2    | 4EOM | A     | 2.1  | -135.9 | -180.0 | 56.8    | 76.4    | 194.3    | -4.5     | -93.7   | 18.3    | 281.7    | ATP    |
| CDK2    | 4EOM | C     | 2.1  | -134.3 | 179.5  | 56.9    | 73.6    | 194.6    | 8.9      | -89.3   | 27.1    | 288.3    | ATP    |
| CDK2    | 4EOO | A     | 2.1  | -137.3 | -178.3 | 51.9    | 74.5    | 189.5    | -2.6     | -88.8   | 23.7    | 283.6    | ATP    |
| CDK2    | 4EOO | C     | 2.1  | -132.9 | -176.4 | 50.3    | 74.1    | 194.7    | 1.1      | -84.3   | 27.4    | 283.8    | ATP    |
| CDK2    | 4EOQ | A     | 2.1  | -136.2 | -179.0 | 55.1    | 77.3    | 197.2    | 1.6      | -91.4   | 19.3    | 282.3    | ATP    |
| FGFR2   | 2PVF | A     | 1.8  | -138.9 | -175.2 | 54.7    | 80.5    | 190.7    | -12.4    | -90.1   | 24.3    | 291.1    | ACP    |
| FGFR2   | 3CLY | A     | 2.0  | -138.8 | -172.7 | 51.3    | 79.8    | 187.4    | -3.1     | -91.3   | 32.5    | 290.5    | ACP    |
| INSR    | 1IR3 | A     | 1.9  | -133.7 | -168.2 | 47.5    | 85.0    | 199.9    | -12.6    | -100.3  | 24.6    | 303.4    | ANP    |
| INSR    | 3BU5 | A     | 2.1  | -128.7 | -166.6 | 44.5    | 89.6    | 189.5    | -14.9    | -102.8  | 23.9    | 295.9    | ATP    |
| KAPCA   | 4WB5 | A     | 1.6  | -123.1 | 176.8  | 69.0    | 80.0    | 197.4    | -7.7     | -91.5   | 24.9    | 270.2    | ATP    |
| KAPCA   | 4WB6 | A     | 2.1  | -118.4 | -169.5 | 51.7    | 82.5    | 197.0    | -10.7    | -95.6   | 17.7    | 271.2    | ATP    |
| KAPCA   | 4WB6 | B     | 2.1  | -117.8 | -168.3 | 53.2    | 78.4    | 192.7    | -12.2    | -91.3   | 29.4    | 275.0    | ATP    |
| KAPCA   | 4WB8 | A     | 1.5  | -121.5 | -177.2 | 62.7    | 77.8    | 196.8    | -6.9     | -92.0   | 24.6    | 268.9    | ATP    |
| KPCI    | 5LI1 | A     | 2.0  | -129.2 | 177.0  | 73.2    | 90.2    | 187.2    | 4.7      | -103.9  | 11.5    | 308.2    | ANP    |
| MK01    | 5V60 | A     | 2.1  | -124.3 | -175.3 | 60.5    | 75.4    | 193.8    | 5.9      | -91.1   | 25.4    | 286.1    | ACP    |
| PAK1    | 3Q53 | A     | 2.0  | -131.4 | -173.5 | 59.2    | 73.6    | 202.0    | -16.8    | -91.7   | 13.0    | 288.7    | ATP    |
| PAK4    | 4JDI | A     | 1.8  | -134.3 | 177.9  | 63.7    | 71.6    | 185.9    | 8.0      | -94.6   | 13.8    | 289.8    | ANP    |
| PDPK1   | 4A07 | A     | 1.8  | -135.4 | -178.9 | 76.0    | 72.4    | 205.6    | 22.7     | -109.0  | 8.7     | 286.3    | ATP    |
| PDPK1   | 4AW0 | A     | 1.4  | -134.8 | 177.3  | 78.7    | 76.2    | 199.3    | 18.1     | -106.3  | 8.6     | 283.5    | ATP    |
| PDPK1   | 4AW1 | A     | 1.6  | -137.2 | -178.3 | 69.0    | 84.7    | 188.0    | 9.9      | -105.4  | 17.0    | 286.1    | ATP    |
| STK24   | 4QML | A     | 1.8  | -130.4 | 172.3  | 70.8    | 79.3    | 196.8    | -0.6     | -104.6  | 20.0    | 285.9    | ANP    |

**Table S2:** Cluster centroids

| <b>Spatial group</b> | <b>Cluster</b>       | <b>X-DFG<br/><math>\Phi, \Psi</math></b> | <b>DFG-Asp<br/><math>\Phi, \Psi</math></b> | <b>DFG-Phe<br/><math>\Phi, \Psi</math></b> | <b><sup>†</sup>DFG-Phe<br/><math>\chi_1</math></b> | <b>Example</b> |
|----------------------|----------------------|------------------------------------------|--------------------------------------------|--------------------------------------------|----------------------------------------------------|----------------|
| DFG <sub>in</sub>    | BLA <sub>minus</sub> | -129, 179                                | 61, 81                                     | -97, 20                                    | -71                                                | 3BU5_A (INSR)  |
|                      | BLA <sub>plus</sub>  | -119, 168                                | 59, 34                                     | -89, -8                                    | 56                                                 | 4OTH_A (PKN1)  |
|                      | ABA <sub>minus</sub> | -112, -8                                 | -141, 148                                  | -128, 23                                   | -64                                                | 1U46_A (ACK1)  |
|                      | BLB <sub>minus</sub> | -135, 175                                | 60, 65                                     | -79, 145                                   | -73                                                | 1R3C_A (MK14)  |
|                      | BLB <sub>plus</sub>  | -125, 172                                | 60, 33                                     | -85, 145                                   | 49                                                 | 3PIX_A (BTK)   |
|                      | BLB <sub>trans</sub> | -106, 157                                | 69, 21                                     | -62, 134                                   | -145                                               | 3VRZ_A (HCK)   |
|                      | Noise                | -                                        | -                                          | -                                          | -                                                  | 3BZ3_A (FAK1)  |
| DFG <sub>out</sub>   | BBA <sub>minus</sub> | -138, -176                               | -144, 104                                  | -82, -9                                    | -70                                                | 3BE2_A (VGFR2) |
|                      | Noise                | -                                        | -                                          | -                                          | -                                                  | 3LW0_A (IGF1R) |
| DFG <sub>inter</sub> | BAB <sub>trans</sub> | -80, 128                                 | -117, 24                                   | -85, 133                                   | -179                                               | 3SXR_A (BMX)   |
|                      | Noise                | -                                        | -                                          | -                                          | -                                                  | 5EW9_A (AURKA) |

Angles in degrees.

<sup>†</sup>Phe side chain rotamers: plus:  $0^\circ < \chi_1 \leq 120^\circ$ ; trans:  $120^\circ < \chi_1 \leq 240^\circ$ ; minus:  $240^\circ < \chi_1 \leq 360^\circ$

**Table S3:** Beta turns in activation loop across different conformations (% chains) and DFG-Asp  $\chi_1$  rotamer populations of each cluster (% of chains in each cluster)

| Spatial groups | Clusters | Beta turn beginning with DFG-Asp (turn type) | Beta turn beginning with DFG-Phe (turn type) | Plus | Trans | Minus |
|----------------|----------|----------------------------------------------|----------------------------------------------|------|-------|-------|
| DFGin          | BLAminus | -                                            | 96 (I)                                       | -    | 85    | 15    |
|                | BLAplus  | 49 (I)                                       | 11 (II)                                      | -    | 25    | 75    |
|                | ABAminus | -                                            | 55 (I)                                       | 27   | 71    | 2     |
|                | BLBminus | 7 (II)                                       | -                                            | -    | 67    | 31    |
|                | BLBplus  | 60 (II)                                      | 11 (II')                                     | -    | 25    | 75    |
|                | BLBtrans | 95 (II)                                      | -                                            | -    | 5     | 95    |
| DFGout         | BBAminus | 7 (I)                                        | 10 (II')                                     | 31   | 66    | 3     |
| DFGinter       | BABtrans | 95 (II)                                      | -                                            | 52   | 39    | 10    |

Aspartic acid  $\chi_1$  rotamers are given as Plus ( $0^\circ < \chi_1 \leq 120^\circ$ ), Trans ( $120^\circ < \chi_1 \leq 240^\circ$ ), Minus ( $240^\circ < \chi_1 \leq 360^\circ$ ).

**Table S4:** Structures with intact regulatory spines across different clusters (% of chains in each cluster)

| Spatial group | Clusters | <sup>†</sup> S1<br>(HRD-His /<br>DFG-Phe) | S2<br>(DFG-Phe /<br>$\alpha$ C-Glu+4) | *S3<br>( $\alpha$ C-Glu+4 /<br>$\beta$ 4-X) | All three |
|---------------|----------|-------------------------------------------|---------------------------------------|---------------------------------------------|-----------|
| DFGin         | BLAminus | 100                                       | 99                                    | 99                                          | 98        |
|               | BLAplus  | 100                                       | 100                                   | 100                                         | 100       |
|               | ABAminus | 67                                        | 98                                    | 98                                          | 67        |
|               | BLBminus | 94                                        | 78                                    | 85                                          | 70        |
|               | BLBplus  | 99                                        | 74                                    | 94                                          | 73        |
|               | BLBtrans | 99                                        | 27                                    | 95                                          | 27        |
| DFGout        | BBAminus | -                                         | -                                     | 93                                          | -         |
| DFGinter      | BABtrans | -                                         | 100                                   | 100                                         | -         |

<sup>†</sup>A contact exists if the minimum distance between the side-chain atoms of the two residues is less than or equal to 4.5 Å.

\* $\beta$ 4-X is typically a hydrophobic residue from  $\beta$ 4 constituting the regulatory spine (Leu196 in Aurora A).

**Table S5:** Comparison of conformational labels with Möbitz's classification (number of chains)

| Spatial group | Clusters | Möbitz DFGin |                     |            |                     |       |                    |            | Möbitz DFGout  |                 |             |            |              |
|---------------|----------|--------------|---------------------|------------|---------------------|-------|--------------------|------------|----------------|-----------------|-------------|------------|--------------|
|               |          | Active       | DFGact<br>Chelixout | FG<br>down | FGdown<br>Chelixout | Gdown | Gdown<br>Chelixout | AuP<br>Met | DFG<br>Flipped | DFGout<br>Type2 | AuP<br>BRAF | AuP<br>FMS | AuP<br>IGF1R |
| DFGin         | BLAminus | 1805         | 5                   | 1          | 1                   | 1     | 7                  | -          | -              | -               | -           | -          |              |
|               | BLAplus  | 1            | 13                  | 38         | 7                   | -     | -                  | -          | -              | -               | -           | -          |              |
|               | ABAminus | 198          | -                   | -          | -                   | 69    | 1                  | -          | -              | -               | -           | -          |              |
|               | BLBminus | 5            | -                   | 5          | 6                   | 31    | 49                 | -          | -              | -               | -           | -          |              |
|               | BLBplus  | -            | 1                   | 78         | 125                 | -     | 48                 | 34         | -              | -               | -           | -          |              |
|               | BLBtrans | -            | -                   | -          | 179                 | -     | -                  | -          | -              | -               | -           | -          |              |
|               | Noise    | 43           | 2                   | 2          | 16                  | 2     | 6                  | 1          | 3              | -               | -           | -          |              |
| DFGout        | BBAminus | -            | -                   | -          | -                   | -     | -                  | -          | -              | 73              | 31          | 20         | 1            |
|               | Noise    | -            | -                   | -          | -                   | -     | -                  | -          | 12             | 2               | 7           | 6          | 4            |
| DFGinter      | BABtrans | -            | -                   | -          | -                   | -     | -                  | -          | 13             | -               | -           | -          | -            |
|               | Noise    | -            | -                   | -          | -                   | -     | -                  | -          | 6              | -               | -           | -          | -            |

**Table S6:** Comparison of conformational labels with Ung et al.'s classification (number of chains)

| <b>Spatial groups</b> | <b>Clusters</b> | <b>*CIDI</b> | <b>†CIDO</b> | <b>‡CODI</b> | <b>§CODO</b> | <b>¶<math>\omega</math>CD</b> |
|-----------------------|-----------------|--------------|--------------|--------------|--------------|-------------------------------|
| DFGin                 | BLAminus        | 1434         | -            | 18           | -            | -                             |
|                       | BLAplus         | 31           | -            | 30           | -            | -                             |
|                       | ABAminus        | 265          | -            | 6            | -            | -                             |
|                       | BLBminus        | 67           | -            | 68           | -            | -                             |
|                       | BLBplus         | 87           | -            | 212          | -            | -                             |
|                       | BLBtrans        | -            | -            | 173          | -            | -                             |
|                       | Noise           | 55           | -            | 41           | -            | 28                            |
| DFGout                | BBAminus        | -            | 135          | -            | 17           | 1                             |
|                       | Noise           | -            | 34           | -            | 14           | 32                            |
| DFGinter              | BABtrans        | -            | -            | -            | -            | 8                             |
|                       | Noise           | -            | -            | 5            | -            | 50                            |

\* CIDI: C-helix-in - DFGin

† CIDO: C-helix-in - DFGout

‡ CODI: C-helix-out - DFGin

§ CODO: C-helix-out - DFGout

¶  $\omega$ CD - DFGintermediate

**Table S7: FDA approved inhibitors in complex with structures from different clusters.**

| Inhibitor   | PDB code | Clusters                                                               | Kinases (PDBid and chain(s))                                                                                                                                                  |
|-------------|----------|------------------------------------------------------------------------|-------------------------------------------------------------------------------------------------------------------------------------------------------------------------------|
| Afatenib    | OWN      | BLAminus                                                               | EGFR (4G5JA,4G5PA)                                                                                                                                                            |
| Alectinib   | EMH      | ABAminus                                                               | ALK (3AOXA)                                                                                                                                                                   |
| Axitinib    | AXI      | BLAminus<br>BBAminus<br>DFGout-noise                                   | ABL1 (4TWPA,B)<br>VGFR2 (4AG8A)<br>ABL1 (4WA9B)                                                                                                                               |
| Bosutinib   | DB8      | BLAminus<br>BLBminus<br>BLBplus<br>DFGin-noise<br>DFGinter-noise       | PMYT1 (5VCYA), SRC (4MXOA,B, 4MXYA,B, 4MXZA,B), STK24 (4QMNA), WEE1 (5VC3A)<br>EPHA2 (5I9XA)<br>ERBB3 (4OTWA)<br>STK10 (5AJQA,B)<br>ABL1 (3UE4A,B), KCC2(3SOAA)               |
| Cobimetinib | EUI      | BLBplus                                                                | MP2K1 (4AN2A, 4LMNA)                                                                                                                                                          |
| Crizotinib  | VGH      | ABAminus<br>BLBplus                                                    | ALK (2XP2A, 2YFXA, 5AAAA, 5AABA, 5AACA), ROS1 (3ZBFA)<br>MET (2WGJA)                                                                                                          |
| Dabrafenib  | P06      | BLBminus                                                               | BRAF (4XV2A,B, 5CSWB, 5HIEA,B,C,D)                                                                                                                                            |
| Dacomitinib | 1C9      | BLAminus<br>BLBtrans                                                   | EGFR (4I23A)<br>EGFR (4I24A,B)                                                                                                                                                |
| Dasatinib   | 1N1      | BLAminus<br>BLAplus<br>BLBminus<br>BLBplus<br>BABtrans<br>DFGout-noise | ABL1 (2GQGA,B), PMYT1 (5VCVA), STK10 (5OWRA), STK24 (4QMSA)<br>BTK (3K54A)<br>EPHA2 (5I9YA)<br>PTK6 (5H2UA,B,C,D)<br>ABL1 (4XEYB), BMX (3SXRA,B), BTK (3OCTA)<br>DDR1 (5BVWA) |
| Erlotinib   | AQ4      | BLAminus<br>BLBtrans                                                   | EGFR (1M17A)<br>EGFR (4HJOA)                                                                                                                                                  |
| Gefitinib   | IRE      | BLAminus<br>BLBtrans                                                   | EGFR (2ITOA, 2ITYA, 2ITZA, 3UG2A, 4WKQA)<br>EGFR (4I22A)                                                                                                                      |
| Ibrutinib   | 1E8      | BLBplus                                                                | BTK (5P9IA)                                                                                                                                                                   |
| Imatinib    | STI      | BLAminus<br>BBAminus                                                   | KSYK (1XBBA)<br>ABL1 (2HYA,B,C,D, 3PYA,B), ABL2 (3GVUA), CSF1R (4R7IA),<br>DDR1 (4BKJA,B), KIT (1T46A), LCK (2PLOA)                                                           |
| Lapatinib   | FMM      | BLBplus                                                                | EGFR (1XKKA), ERBB4 (3BBTB,D)                                                                                                                                                 |
| Lenvatinib  | LEV      | BLBplus                                                                | VGFR2 (3WZDA)                                                                                                                                                                 |
| Neratinib   | HKI      | BLAminus<br>BLBplus                                                    | EGFR (3W2QA)<br>EGFR (2JIVB)                                                                                                                                                  |
| Nilotinib   | NIL      | BBAminus                                                               | ABL1 (3CS9A,B,C,D), MK11 (3GP0A)                                                                                                                                              |
| Nintedanib  | XIN      | BLAminus                                                               | AAK1 (5TE0A)                                                                                                                                                                  |
| Osimertinib | YY3      | BLAminus                                                               | EGFR (4ZAU)                                                                                                                                                                   |
| Palbociclib | LQQ      | BLAminus<br>BLBplus                                                    | CDK6 (2EUFB)<br>CDK6 (5L2IA)                                                                                                                                                  |
| Ponatinib   | OLI      | BBAminus                                                               | DDR1 (3ZOSA,B), FGFR4 (4TYJA, 4UXQA)                                                                                                                                          |
| Ribociclib  | 6ZZ      | BLBplus                                                                | CDK6 (5L2TA)                                                                                                                                                                  |
| Sorafenib   | BAX      | BBAminus                                                               | BRAF (1UWHA,B, 1UWJA,B, 5HI2A), CDK8 (3RGFA), MK14 (3GCSA, 3HEGA), VGFR2 (3WZEA)                                                                                              |
| Sunitinib   | B49      | BLAminus<br>BLAplus<br>BLBminus<br>BBAminus<br>DFGout-noise            | PAK6 (4KS8A), PHKG2 (2Y7JA,B,C,D), STK24 (4QMZA)<br>ITK (3MIYB)<br>CDK2 (3T11A)<br>KIT (3G0FA,B)<br>KIT (3G0EA)                                                               |
| Tofacitinib | MI1      | BLAplus<br>ABAminus                                                    | PKN1 (4OTIA)<br>JAK1_2 (3EYGA), JAK2_2 (3FUPA), JAK3_2 (3LXKA), TYK2 (3LXNA)                                                                                                  |
| Vemurafenib | 032      | BLAplus                                                                | BRAF (3OG7A, 4RZVA,B), MLTK (5HESA,B)                                                                                                                                         |

## Silhouette Score All Clusters

n = 4387

8 clusters  $C_j$   
 $j : n_j \mid \text{ave}_{i \in C_j} s_i$

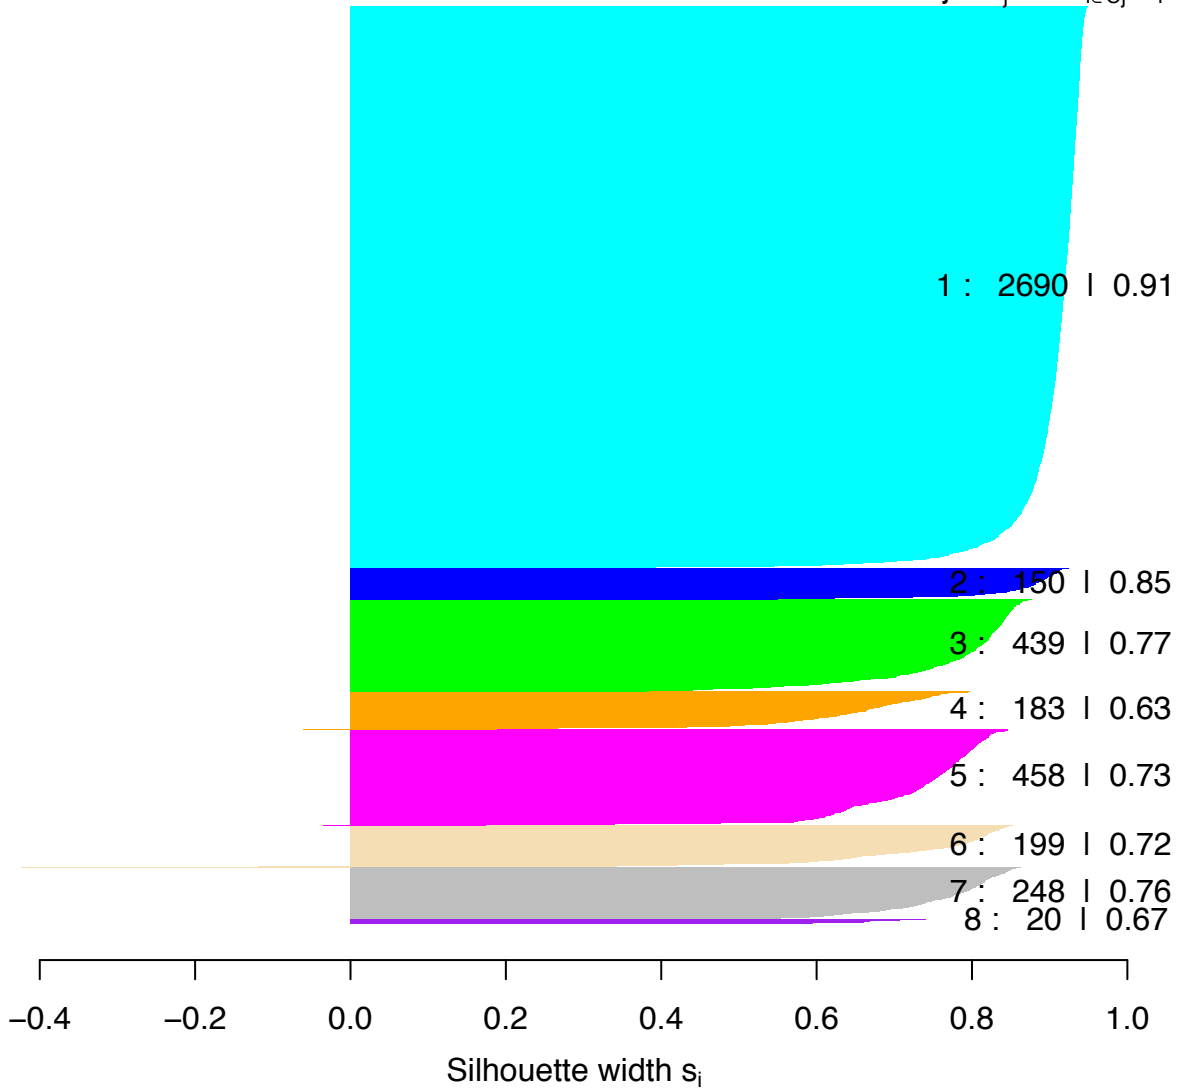

**Fig. S1.** Silhouette scores for all the clusters. Average value over all data points is 0.84, which indicates that the clusters are well separated and well defined.



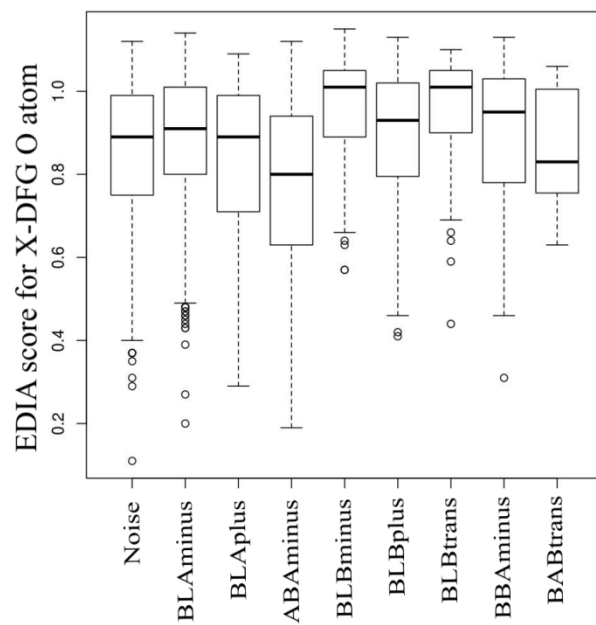

**Fig. S2.** EDIA score of X-DFG O atom across different clusters. An atom is modeled correctly if its score is 0.8 or more.

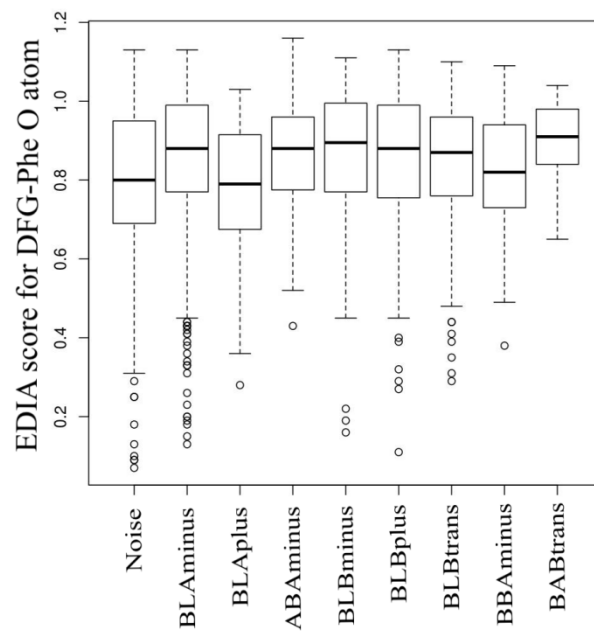

**Fig. S3.** EDIA score for DFG-Phe O atom.

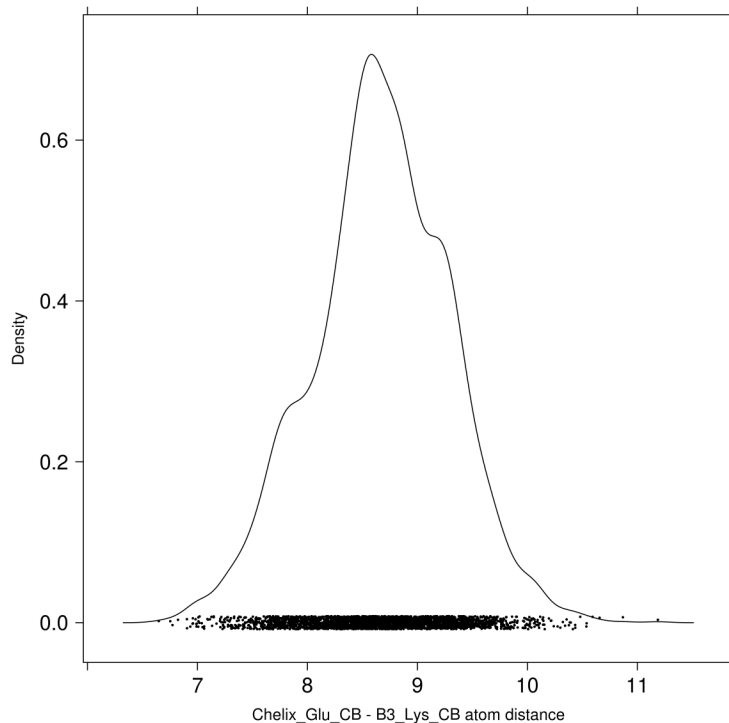

**Fig. S4.** Distribution of distances between C-helix-Glu-CB and  $\beta$ 3-Lys-CB atoms in the structures which have an intact salt bridge between these residues (3327 chains, 200 kinases).

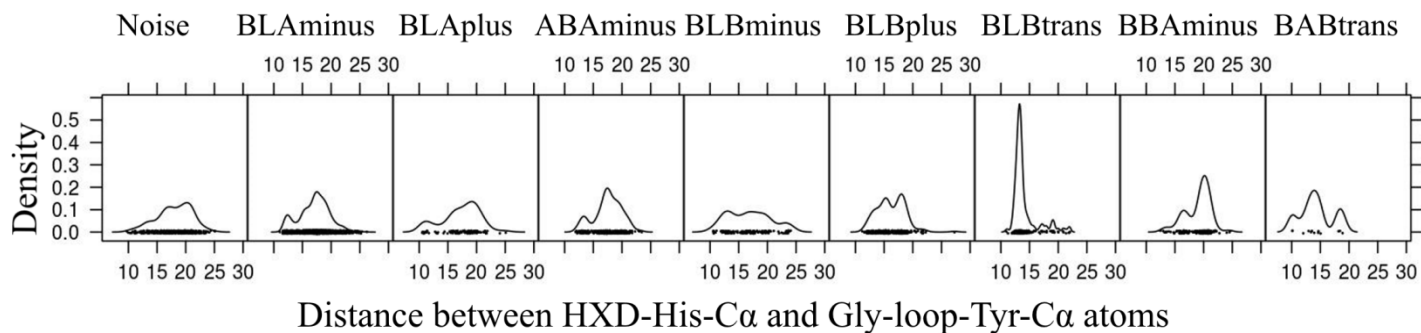

**Fig. S5.** Distribution of Gly-rich loop conformations - distance between HRD-His-C $\alpha$  and Gly-rich loop-Phe/Tyr-C $\alpha$  atoms (Phe144 in Aurora A kinase).

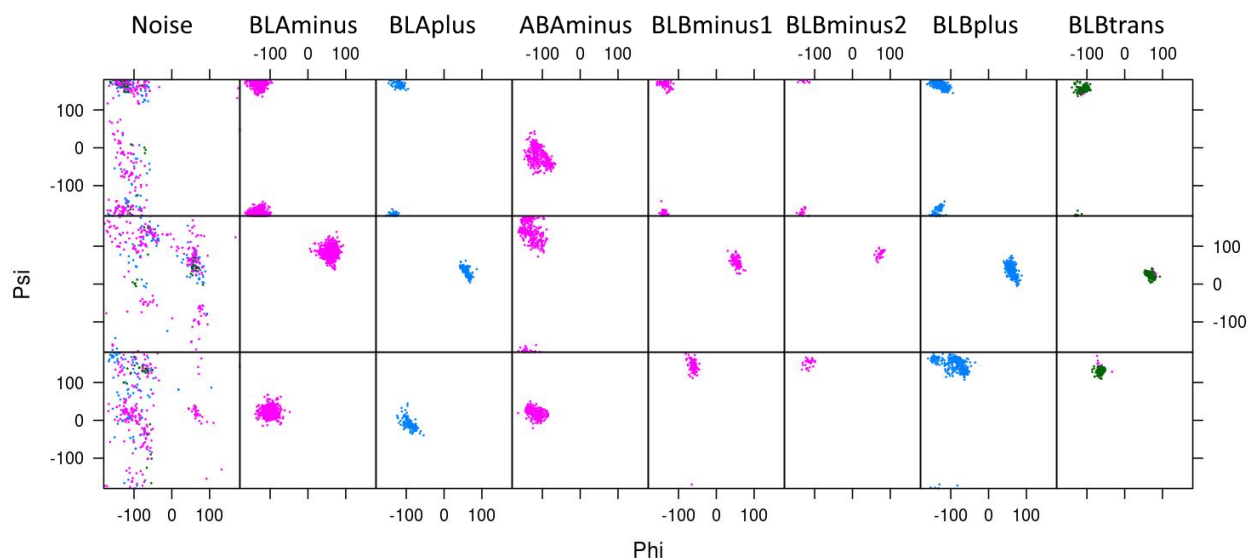

**Fig. S6:** DBSCAN clustering of XDF conformations of DFGin structures with  $\epsilon=0.04$  and  $MinPts=20$  (clustering in Fig. 4 used  $\epsilon=0.05$  and  $MinPts=20$ ). Backbone dihedral angles of X-DFG (top row), DFG-Asp (middle row) and DFG-Phe (bottom row) and the  $\chi_1$  of DFG-Phe (minus in magenta; plus in blue; trans in green) are plotted. The lower value of  $\epsilon$  splits the "B" region of DFG-Phe residue in the BLBminus cluster into two subclusters labeled BLBminus1 and BLBminus2. These two clusters differ by about  $40^\circ$  in the  $\phi$  dihedral of the DFG-Phe residue. We could not find any biologically meaningful difference between the structures in these two subclusters.

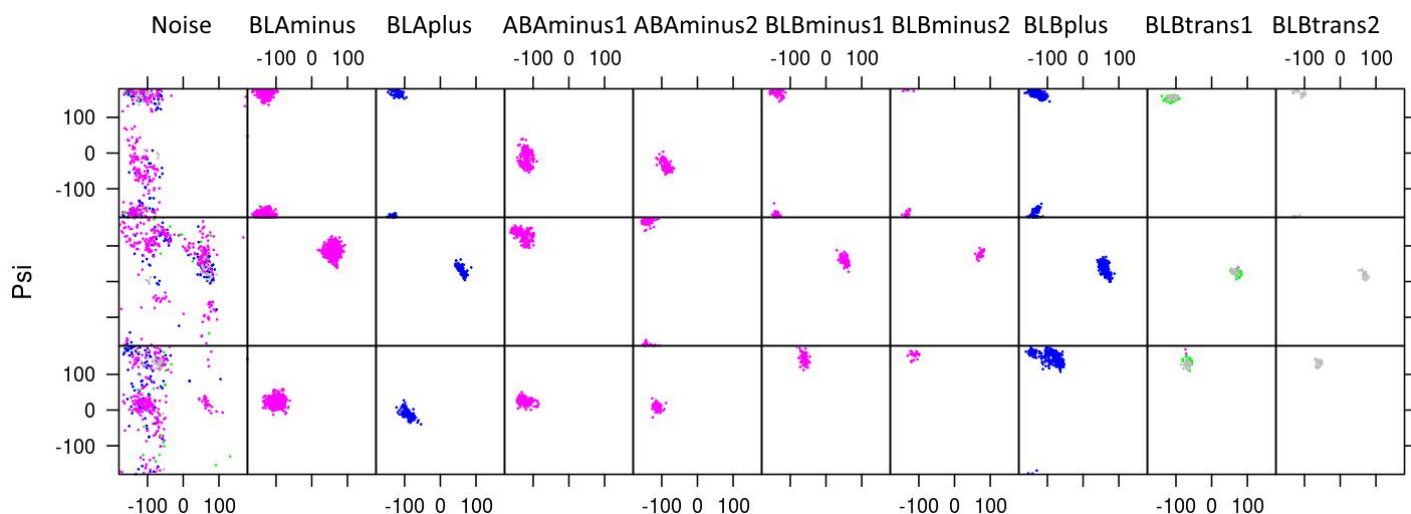

**Fig. S7:** DBSCAN clustering of XDF conformations of DFGin structures with  $\epsilon=0.03$  and  $MinPts=20$  (clustering in Fig. 4 used  $\epsilon=0.05$  and  $MinPts=20$ ). Backbone dihedral angles of X-DFG (top row), DFG-Asp (middle row) and DFG-Phe (bottom row) and the  $\chi_1$  of DFG-Phe (minus in magenta; plus in blue; trans in green) are plotted. The lower value of  $\epsilon$  splits the ABAMinus, BLBminus, and BLBtrans clusters in a way that is not productive (labeled ABAMinus1,2, etc.).

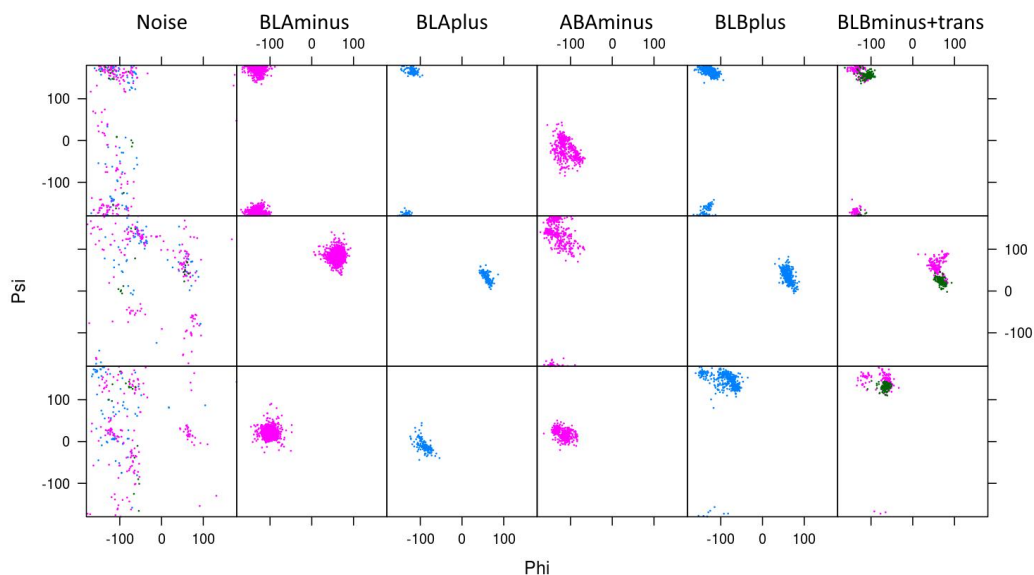

**Fig. S8:** DBSCAN clustering of XDF conformations of DFGin structures with  $\epsilon=0.06$  and  $MinPts=20$  (clustering in Fig. 4 used  $\epsilon=0.05$  and  $MinPts=20$ ). Backbone dihedral angles of X-DFG (top row), DFG-Asp (middle row) and DFG-Phe (bottom row) and the  $\chi_1$  of DFG-Phe (minus in magenta; plus in blue; trans in green) are plotted. With the higher value of  $\epsilon$ , the BLBminus and BLBtrans clusters with different DFG-Phe rotamers merge into one cluster. By examining structures in these two clusters, we observe that the directionality of the activation loop is different in each structure as is the space available in the C-helix pocket for inhibitors.

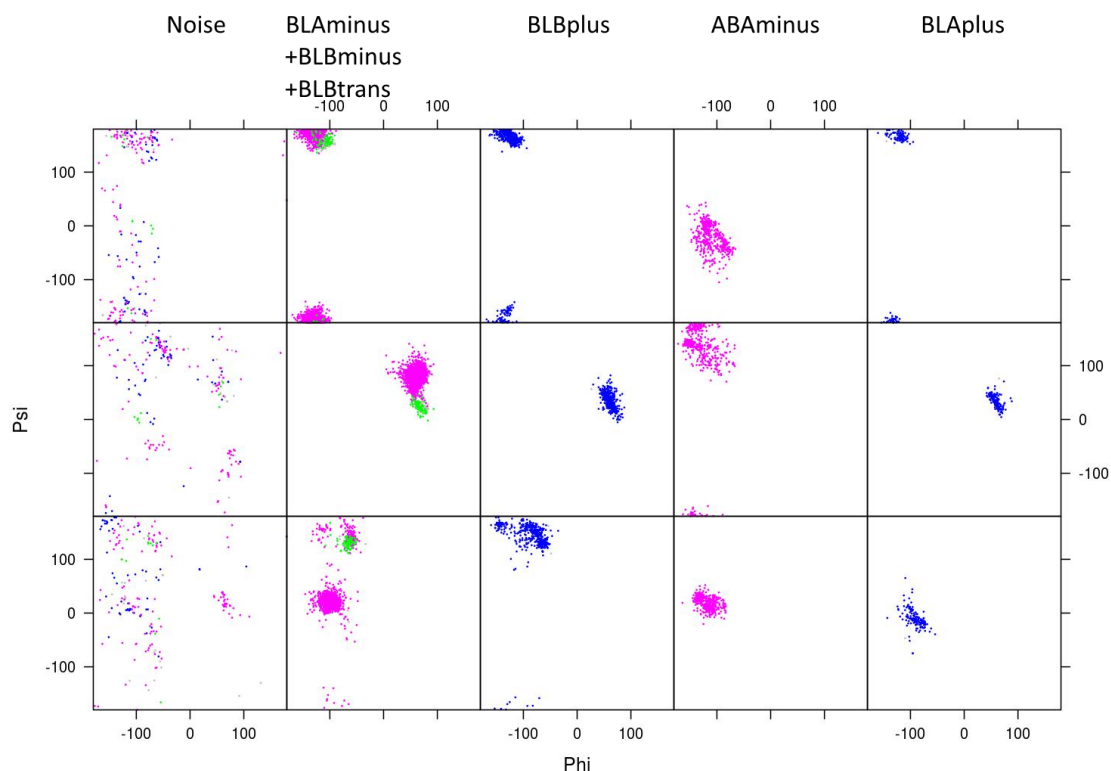

**Fig. S9:** DBSCAN clustering of XDF conformations of DFGin structures with  $\epsilon=0.09$  and  $MinPts=20$  (clustering in Fig. 4 used  $\epsilon=0.05$  and  $MinPts=20$ ). Backbone dihedral angles of X-DFG (top row), DFG-Asp (middle row) and DFG-Phe (bottom row) and the  $\chi_1$  of DFG-Phe (minus in magenta; plus in blue; trans in green) are plotted. With the higher value of  $\epsilon$ , BLAminus, BLBminus, and BLBtrans structures are grouped together (2nd column), merging distinct regions of the Ramachandran map and different rotamers into the same cluster.
